# Supplementary material
Source: PubMed Central journal article supplement (PMC8692558)
Supplement: 12250_2021_414_MOESM1_ESM.pdf [file 12250_2021_414_MOESM1_ESM.pdf]

## Electronic Supplementary Material

### Desmoglein 2 (DSG2) Is A Receptor of Human Adenovirus Type 55 Causing Adult Severe Community-Acquired Pneumonia

Jing Zhang<sup>1,2</sup> · Kui Ma<sup>1</sup> · Xiangyu Wang<sup>2</sup> · Yinbo Jiang<sup>3</sup> · Shan Zhao<sup>2</sup> · Junxian Ou<sup>2</sup> · Wendong Lan<sup>2</sup> · Wenyi Guan<sup>2</sup> · Xiaowei Wu<sup>2</sup> · Heping Zheng<sup>3</sup> · Bin Yang<sup>3</sup> · Chengsong Wan<sup>2</sup> · Wei Zhao<sup>2</sup> · Jianguo Wu<sup>1</sup>✉ · Qiwei Zhang<sup>1,2</sup>✉

1. Guangdong Provincial Key Laboratory of Virology, Institute of Medical Microbiology, Jinan University, Guangzhou 510632, China

2. Guangdong Provincial Key Laboratory of Tropical Disease Research, School of Public Health, Southern Medical University, Guangzhou 510515, China

3. Guangdong Provincial Dermatology Hospital, Southern Medical University, Guangzhou 510091, China

Supporting information to DOI: 10.1007/s12250-021-00414-7

The animation generated by tomography showed the three-dimensional binding model between HAdV-B55 and DSG2 in A549 cells.
